# Supplementary material for: Incidence of Diabetes Mellitus and Evolution of Glucose Parameters in Growth Hormone–Deficient Subjects During Growth Hormone Replacement Therapy
Source: Oxford University Press journal article supplement (doi:10.2337/dc11-0449), 2011-11-11
Supplement: dc110449supplementarydata.pdf [file dc110449supplementarydata.pdf]

## SUPPLEMENTARY DATA

**Supplementary Table 1.** Ratio of observed number of patients with diabetes in KIMS vs expected number of patients with diabetes (O/E) using data from several different European regions and the US. As O/E varies in KIMS over attained age with the Kronoberg County as reference, restriction of attained age range was necessary in the respective comparison.

| Reference-Study <sup>1</sup> | Attained age-range, years | KIMS vs corresponding reference and attained age-range <sup>2</sup> |             | KIMS vs Kronoberg County reference in corresponding attained age-range <sup>3</sup> |             |
|------------------------------|---------------------------|---------------------------------------------------------------------|-------------|-------------------------------------------------------------------------------------|-------------|
|                              |                           | OE                                                                  | 95% CI      | OE                                                                                  | 95% CI      |
| Bruneck (Ref.17)             | 40 - 79                   | 3.52                                                                | 3.20 – 3.85 | 5.49                                                                                | 4.99 – 6.01 |
| KORA S4/F4 (Ref. 18)         | 55 – 74                   | 2.11                                                                | 1.86 – 2.39 | 4.52                                                                                | 3.97 – 5.12 |
| US adults (Ref. 19)          | 18 – 79                   | 2.93                                                                | 2.68 – 3.19 | 6.04                                                                                | 5.54 – 6.59 |
| MONICA Augsburg (Ref. 20)    | 35 – 74                   | 5.22                                                                | 4.76 – 5.72 | 5.78                                                                                | 5.26 – 6.33 |

<sup>1</sup> Bruneck and US adult study stratified for attained age. KORA study consisted of one single attained age class. The MONICA Augsburg study was stratified for attained age and gender.

<sup>2</sup> KIMS O/E for respective study-reference is calculated using the same attained age range in KIMS as presented in the specific study.

<sup>3</sup> For a correct comparison between the Kronoberg County reference and the respective study-reference in the first column, a corresponding constraint on attained age was done.
